# Supplementary material for: Pro-inflammatory fatty acid profile and colorectal cancer risk: A Mendelian randomisation analysis
Source: PubMed Central journal article supplement (PMC5630201; doi:10.1016/j.ejca.2017.07.034), 2017-10
Supplement: mmc1.pdf [file mmc1.pdf]

## Supplementary Material

**Figure 1: Meta-analysis odds ratios (OR) for colorectal cancer per unit increase in genetic risk score (standard deviation of trait) for non-significant fatty acid associations.**

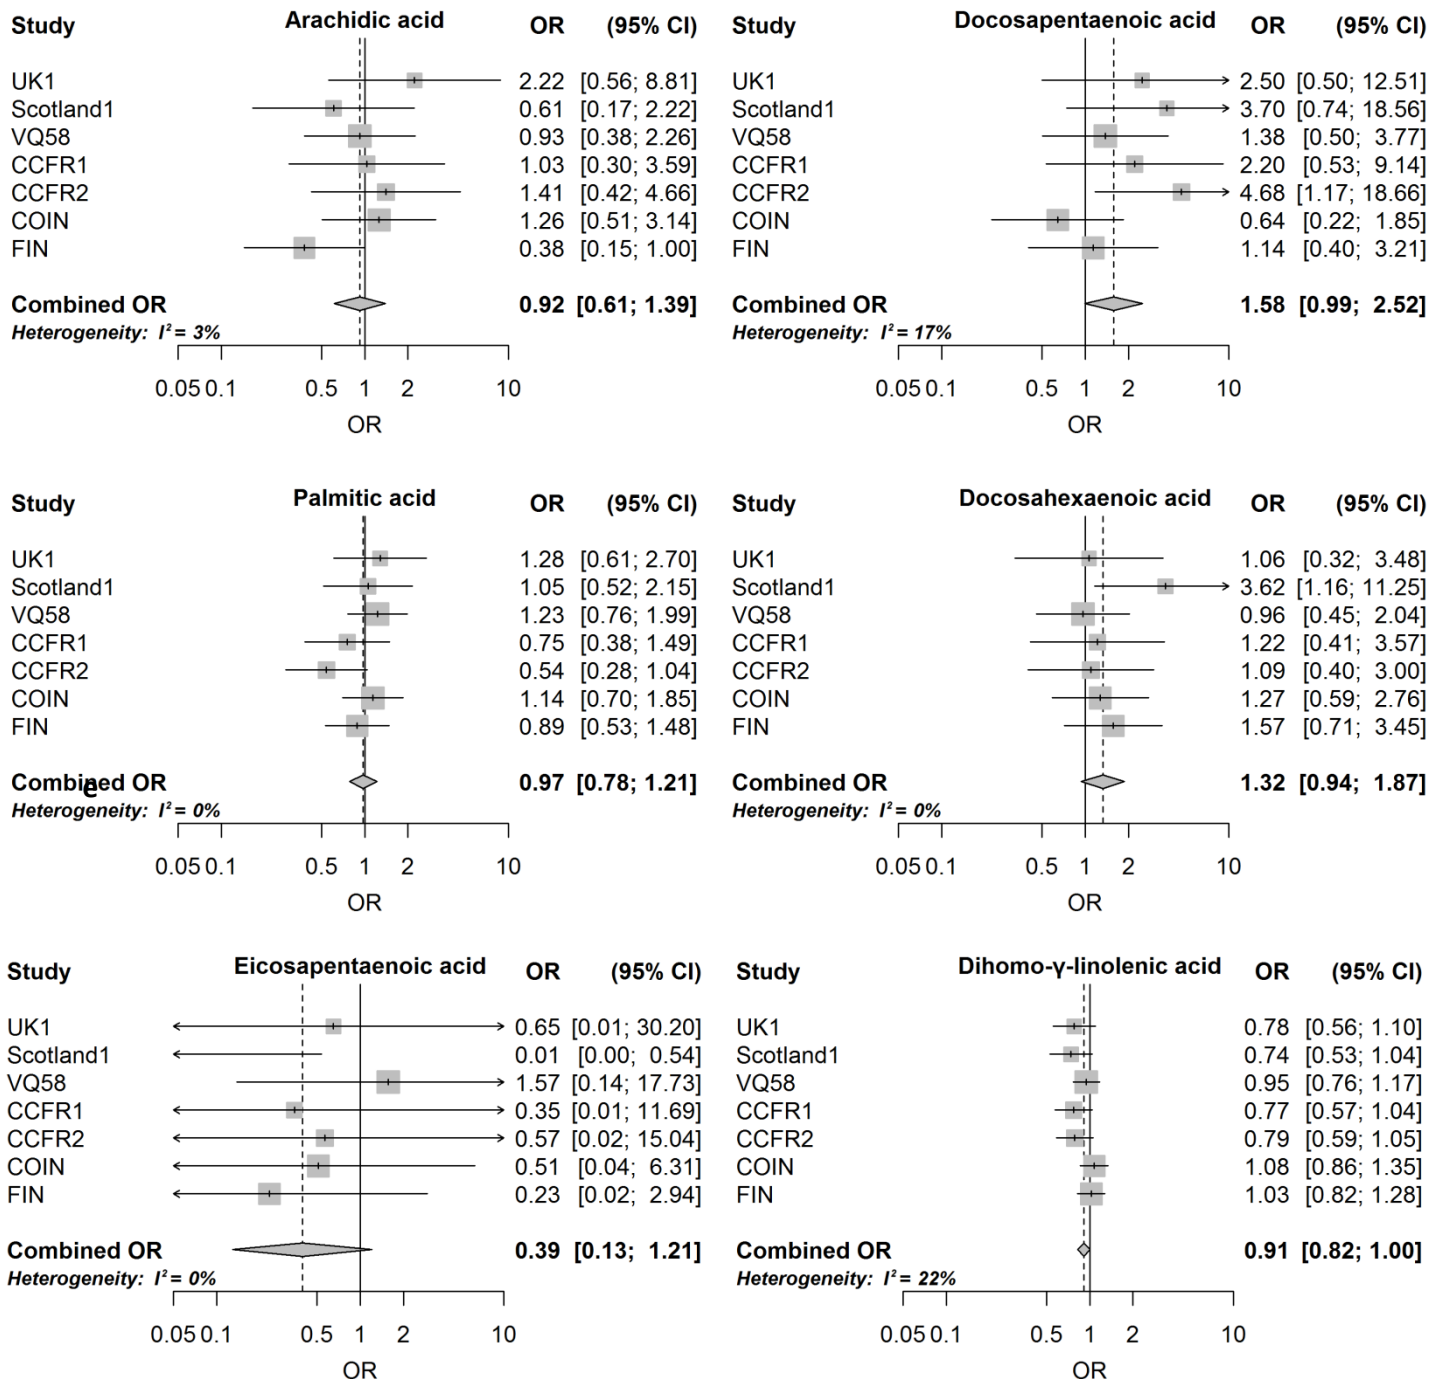

$I^2$ , proportion of the total variation due to heterogeneity. Boxes: OR point estimate; its area is proportional to the weight of the study. Diamond, overall summary estimate, with confidence intervals given by its width. Vertical line: null value (OR = 1.0).
